# Supplementary material for: A New Detection Method of Oral and Oropharyngeal Squamous Cell Carcinoma Based on Multivariate Analysis of Surface Enhanced Raman Spectra of Salivary Exosomes
Source: MDPI journal article supplement (doi:10.3390/jpm13050762), 2023-04-28
Supplement: s1 [file s1]

# A New Detection Method of Oral and Oropharyngeal Squamous Cell Carcinoma Based on Multivariate Analysis of Surface Enhanced Raman Spectra of Salivary Exosomes

Cosmin Ioan Faur <sup>1,†</sup>, Cristian Dinu <sup>2,†</sup>, Valentin Toma <sup>3</sup>, Anca Jurj <sup>4</sup>, Radu Mărginean <sup>3</sup>, Anca Onaciu <sup>3</sup>, Rareș Călin Roman <sup>5,†</sup>, Carina Culic <sup>6</sup>, Magdalena Chirilă <sup>7</sup>, Horațiu Rotar <sup>5</sup>, Alexandra Fălămaș <sup>8</sup>, Gabriela Fabiola Știufiuc <sup>9</sup>, Mihaela Hedeșiu <sup>1,†</sup>, Oana Almășan <sup>10,\*</sup> and Rares Ionuț Știufiuc <sup>2,11,\*</sup>

<sup>1</sup> Department of Oral Radiology, “Iuliu Hațieganu” University of Medicine and Pharmacy, 400347 Cluj-Napoca, Romania

<sup>2</sup> Department of Maxillofacial Surgery and Implantology, “Iuliu Hațieganu” University of Medicine and Pharmacy, 400347 Cluj-Napoca, Romania

<sup>3</sup> MedFuture-Research Center for Advanced Medicine, “Iuliu Hațieganu” University of Medicine and Pharmacy, 400347 Cluj-Napoca, Romania

<sup>4</sup> Research Center for Functional Genomics, Biomedicine and Translational Medicine, “Iuliu Hațieganu” University of Medicine and Pharmacy, 400347 Cluj-Napoca, Romania

<sup>5</sup> Department of Oral and Craniomaxillofacial Surgery, “Iuliu Hațieganu” University of Medicine and Pharmacy, 400347 Cluj-Napoca, Romania

<sup>6</sup> Department of Odontology, Endodontics, Oral Pathology, Faculty of Dentistry, “Iuliu Hațieganu” University of Medicine and Pharmacy, 400347 Cluj-Napoca, Romania

<sup>7</sup> Department of Otorhinolaryngology, “Iuliu Hațieganu” University of Medicine and Pharmacy, 400347 Cluj-Napoca, Romania

<sup>8</sup> Department of Molecular and Biomolecular Physics, National Institute for Research and Development of Isotopic and Molecular Technologies, 400293 Cluj-Napoca, Romania

<sup>9</sup> Faculty of Physics, “Babes Bolyai” University, 400347 Cluj-Napoca, Romania

<sup>10</sup> Department of Prosthodontics and Dental Materials, “Iuliu Hațieganu” University of Medicine and Pharmacy, 400347 Cluj-Napoca, Romania

<sup>11</sup> Department of Pharmaceutical Physics & Biophysics, Faculty of Pharmacy, “Iuliu Hațieganu” University of Medicine and Pharmacy, 400347 Cluj-Napoca, Romania

\* Correspondence: oana.almasan@umfcluj.ro (O.A.); rares.stiufiuc@umfcluj.ro (R.I.Ș.); Tel.: +40-722-336-937 (O.A.); +40-726-340-278 (R.I.Ș.)

† These authors contributed equally to this work.

**Supplemental table.** STARD diagram checklist

| <b>Section &amp; Topic</b> | <b>Item</b>                                                                                                                                                                                     | <b>Rows and Page</b>   |
|----------------------------|-------------------------------------------------------------------------------------------------------------------------------------------------------------------------------------------------|------------------------|
| <b>TITLE OR ABSTRACT</b>   |                                                                                                                                                                                                 |                        |
| <b>1</b>                   | Identification as a study of diagnostic accuracy using at least one measure of accuracy (sensitivity and AUC in the present text)                                                               | 2-4,39-43,47-50 Page 1 |
| <b>ABSTRACT</b>            |                                                                                                                                                                                                 |                        |
| <b>2</b>                   | Structured summary of study design, methods, results, and conclusions                                                                                                                           | 35-50, Page 1          |
| <b>INTRODUCTION</b>        |                                                                                                                                                                                                 |                        |
| <b>3</b>                   | Scientific and clinical background, including the intended use and clinical role of the index test                                                                                              | 52-110, Pages 2-3      |
| <b>4</b>                   | Study objectives and hypotheses                                                                                                                                                                 | 111-123, Pages 2-3     |
| <b>METHODS</b>             |                                                                                                                                                                                                 |                        |
| <i>Study design</i>        |                                                                                                                                                                                                 |                        |
| <b>5</b>                   | Data collection was done after the reference standard was performed and the index test was done after data collection (transversal study)                                                       | 129-138, Page 3        |
| <i>Participants</i>        |                                                                                                                                                                                                 |                        |
| <b>6</b>                   | Eligibility criteria                                                                                                                                                                            | 129-143, Page 3        |
| <b>7</b>                   | The potentially eligible participants were identified by a histopathological examination that certified the presence of squamous cell carcinoma of the oral cavity or oropharynx                | 129-143, Page 3        |
| <b>8</b>                   | The potentially eligible participants were identified at the Emergency County Hospital Cluj-Napoca, Departments of Oral and Maxillofacial Surgery and Otorhinolaryngology between 2020 and 2021 | 129-143, Page 3        |
| <b>9</b>                   | The participants formed a random series, inclusion depending on the presentation to a specific location                                                                                         | 129-143, Page 3        |
| <i>Test methods</i>        |                                                                                                                                                                                                 |                        |
| <b>10a</b>                 | Exosomes isolation and SERS examination of salivary exosomes are sufficient detail to allow replication                                                                                         | 151-177, Page 4        |
| <b>10b</b>                 | Histopathological examination was the reference standard for diagnosis of squamous cell carcinoma                                                                                               | 143-144, Page 3        |
| <b>11</b>                  | Histopathological examination is the gold standard for diagnosis of squamous cell carcinoma                                                                                                     | 143-144, Page 3        |
| <b>12</b>                  | SERS spectra of salivary exosomes from healthy volunteers and cancer patients' sample                                                                                                           | 129-177, Pages 3-4     |
| <b>13a</b>                 | The clinical information and reference standard results were available to the readers of the index test                                                                                         | 129-177, Pages 3-4     |
| <b>13b</b>                 | The clinical information and index test results were available to the assessors of the reference standard                                                                                       | 129-177, Pages 3-4     |
| <i>Analysis</i>            |                                                                                                                                                                                                 |                        |
| <b>14</b>                  | Methods for estimating or comparing measures of diagnostic accuracy                                                                                                                             | 172-206, Page 4        |
| <b>15</b>                  | How indeterminate index test results were handled                                                                                                                                               | 180-195, Page 4        |
| <b>16</b>                  | How missing data on the index test were handled                                                                                                                                                 | 172-199, Page 4        |
| <b>17</b>                  | Any analyses of variability in diagnostic accuracy, distinguishing pre-specified from exploratory                                                                                               | 187-206, Page 4        |
| <b>18</b>                  | Intended sample size and how it was determined                                                                                                                                                  | 172-206, Page 4        |
| <b>RESULTS</b>             |                                                                                                                                                                                                 |                        |
| <i>Participants</i>        |                                                                                                                                                                                                 |                        |

|                          |                                                                                                             |                                                                                         |
|--------------------------|-------------------------------------------------------------------------------------------------------------|-----------------------------------------------------------------------------------------|
| <b>19</b>                | Flow of participants                                                                                        | 201-207 (Table), Pages 4-5                                                              |
| <b>20</b>                | Baseline demographic and clinical characteristics of participants                                           | 205-2007, Pages 4-5                                                                     |
| <b>21a</b>               | Distribution of severity of disease in those with the target condition                                      | 205-207 (Table), Pages 4-5                                                              |
| <b>21b</b>               | Distribution of alternative diagnoses in those without the target condition                                 | 205-207 (Table), Pages 4-5                                                              |
| <b>22</b>                | Time interval and any clinical interventions between index test and reference standard                      | 205-207 (Table) Page 4-5, and 141-145 Page 3                                            |
| <i>Test results</i>      |                                                                                                             |                                                                                         |
| <b>23</b>                | Cross tabulation of the index test results (or their distribution) by the results of the reference standard | 219-271, Pages 5-8                                                                      |
| <b>24</b>                | Estimates of diagnostic accuracy and their precision (such as 95% confidence intervals)                     | 267-299, Pages 8-9                                                                      |
| <b>25</b>                | Any adverse events from performing the index test or the reference standard                                 | 267-299, Pages 8-9                                                                      |
| <b>DISCUSSION</b>        |                                                                                                             |                                                                                         |
| <b>26</b>                | Study limitations, including sources of potential bias, statistical uncertainty, and generalisability       | 418-436, Page 11                                                                        |
| <b>27</b>                | Implications for practice, including the intended use and clinical role of the index test                   | 301-309, 322-383, 408-416, 438-453 Page 9-12                                            |
| <b>OTHER INFORMATION</b> |                                                                                                             |                                                                                         |
| <b>28</b>                | Registration number and name of registry                                                                    | 140-143 Page 2 and 468-471 page 13                                                      |
| <b>29</b>                | Where the full study protocol can be accessed                                                               | It will be indicated after the journal decision related to the pages of the publication |
| <b>30</b>                | Sources of funding and other support; role of funders                                                       | 467, Page 13                                                                            |

**Supplemental Figures.**

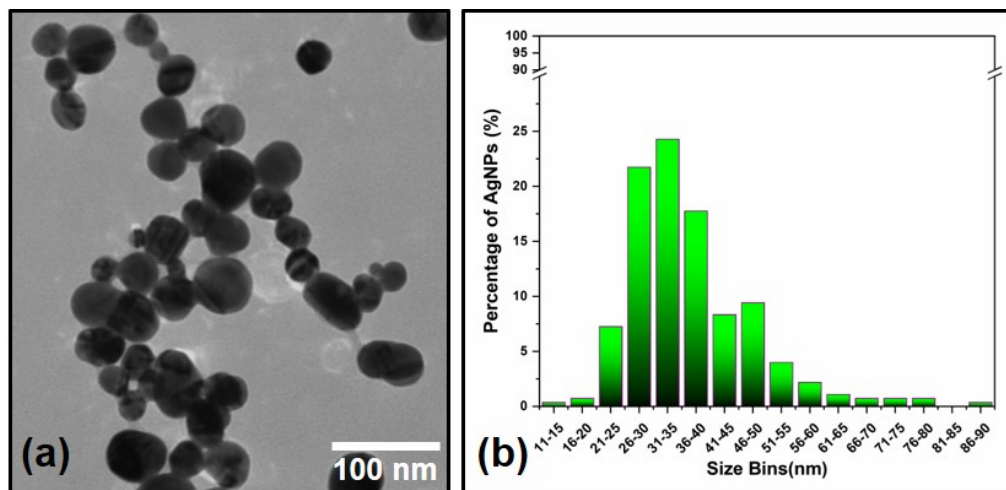

**Figure S1.** TEM image (a) and size distribution plot (b) of filtered and concentrated silver nanoparticles.

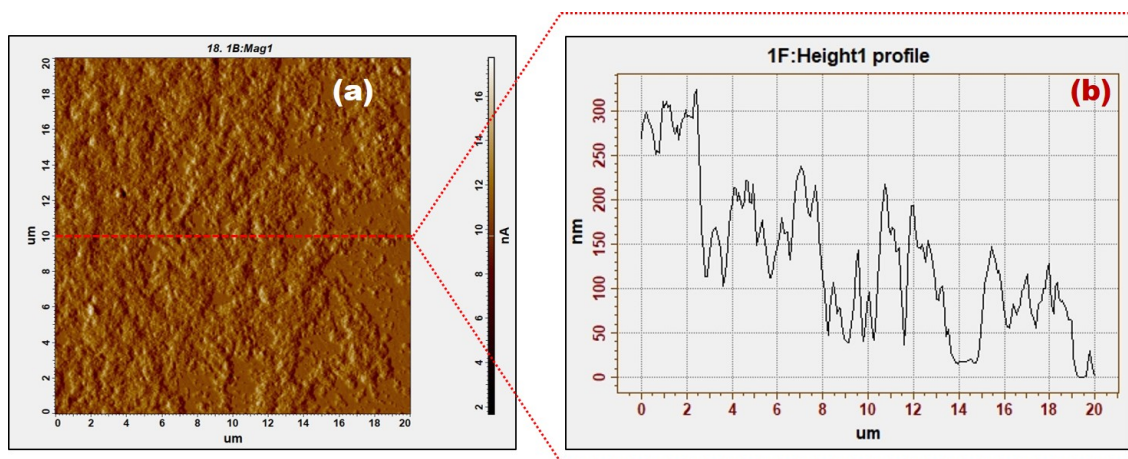

**Figure S2.** AFM image (a) and height profile of filtered and concentrated silver nanoparticles (b).

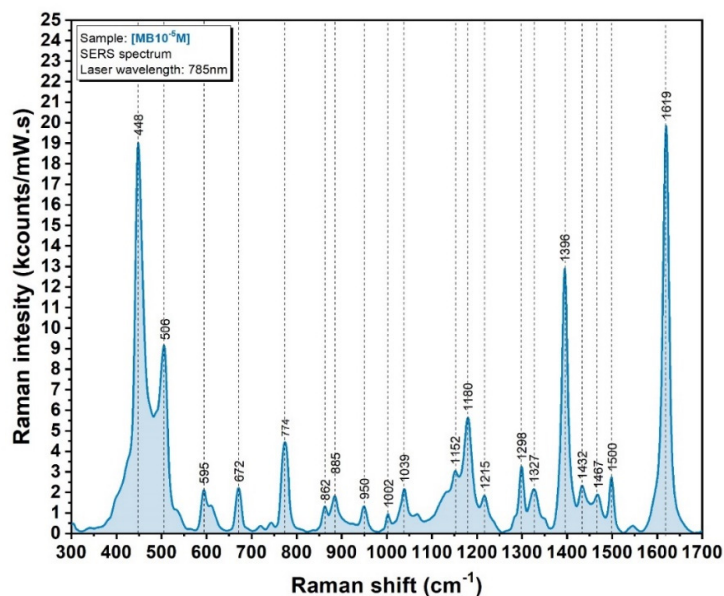

**Figure S3.** SERS spectrum of methylene blue recorded using 785 nm excitation laser.

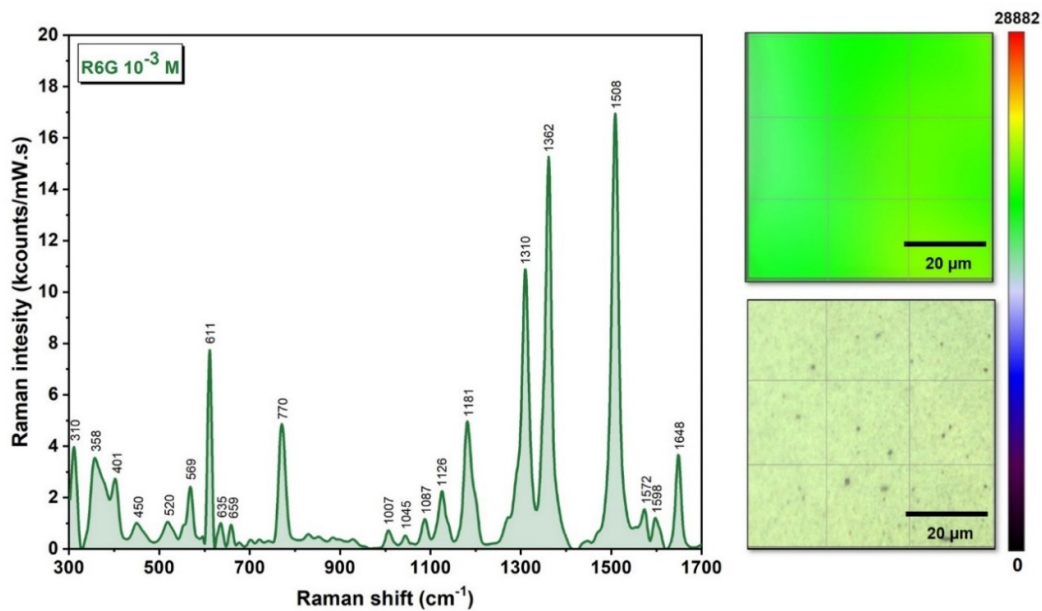

**Figure S4.** SERS spectrum of rhodamine 6G (R6G) recorded using an excitation laser of 785 nm. The heat map is presented on the upper inset and shows a very small variation of the 1508 cm<sup>-1</sup> which is the most intense vibrational peak of R6G. An optical image of the substrate where the spectra were recorded is presented on the lower inset.
